# Supplementary material
Source: PubMed Central journal article supplement (PMC3391079)

## SUPPLEMENTAL FIGURE LEGENDS

### **Supplemental Figure 1. Mass spectrometry characterization of MC $\alpha$ 2(I) glycopeptides [76-90].**

Deconvoluted mass spectrum over the mass range 1200 – 2000 Da showing peptides and glycopeptides containing Hyl 87 formed by in-gel trypsin digestion of the MC  $\alpha$ -2(I). The spectrum was obtained by averaging the MS scans over the chromatographic elution time of all observed species. The ions indicated with an asterisk represent non-related co-eluting species. MC, collagen from MC3T3-E1 cell culture;  $\alpha$ -2(I), type I collagen alpha-2 chain; Lys, lysine; Hyl, hydroxylysine; G-Hyl, galactosylhydroxylysine; GG-Hyl, glucosylgalactosylhydroxylysine.

**Supplemental Figure 2. mRNA expression of *Lox* family (*Lox*, *Loxl*, *Loxl3*, and *Loxl4*) relative to *Col1A2*, in the Sh clones (Sh1-1,-2,and -3) and controls (MC and EV). Note that the expressions of the *Lox* family genes in the Sh clones are not statistically different from those of the controls, MC and EV. *Lox*, lysyl oxidase; *Loxl*, lysyl oxidase like; MC, MC3T3-E1; EV, MC cell-derived clone stably transfected with empty vector; Sh, MC cell-derived clones stably suppressing LH3. Error bar indicates mean  $\pm$  SD from three independent analyses.**

## Supplemental Table 1. Sricholpech *et al.*

**Supplemental Table 1** The tryptic peptides and their modifications considered for the site-specific, relative quantitation of glycosylation .

| Chain/Residue <sup>a</sup> | Peptide <sup>a</sup> | Modifications <sup>b</sup>      | MW(exp)  | MW (theor) | Mass accuracy (ppm) | Retention time (min) <sup>c</sup> |
|----------------------------|----------------------|---------------------------------|----------|------------|---------------------|-----------------------------------|
| $\alpha$ -1(I), K87        | [76-90]              | 2×HYP, HYL                      | 1495.779 | 1495.757   | 14.7                | 37.5                              |
|                            | [76-90]              | 2×HYP, M <sub>ox</sub> , HYL    | 1511.755 | 1511.752   | 1.7                 | 31.7                              |
|                            | [76-90]              | 2×HYP, G-HYL                    | 1657.792 | 1657.809   | 10.5                | 37.1                              |
|                            | [76-90]              | 2×HYP, M <sub>ox</sub> , G-HYL  | 1673.824 | 1673.804   | 11.7                | 31.2                              |
|                            | [76-90]              | 2×HYP, GG-HYL                   | 1819.870 | 1819.862   | 4.2                 | 36.2                              |
|                            | [76-90]              | 2×HYP, M <sub>ox</sub> , GG-HYL | 1835.889 | 1835.857   | 17.7                | 31.1                              |
| $\alpha$ -1(I), K174       | [145-174]            | 3×HYP                           | 2575.222 | 2575.230   | 3.2                 | 46.3                              |
|                            | [145-174]            | 3×HYP, HYL                      | 2591.268 | 2591.225   | 16.8                | 46.0                              |
|                            | [145-183]            | 3×HYP                           | 3398.671 | 3398.624   | 13.7                | 44.6                              |
|                            | [145-183]            | 2×HYP, HYL                      | 3398.671 | 3398.624   | 13.7                | 46.6                              |
|                            | [145-183]            | 3×HYP, HYL                      | 3414.643 | 3414.619   | 6.9                 | 44.1                              |
|                            | [145-183]            | 2×HYP, G-HYL                    | 3560.767 | 3560.677   | 25.2                | 46.2                              |
|                            | [145-183]            | 3×HYP, G-HYL                    | 3576.733 | 3576.672   | 16.9                | 43.9                              |
|                            | [145-183]            | 3×HYP, GG-HYL                   | 3738.823 | 3738.725   | 26.1                | 43.7                              |
| $\alpha$ -2(I), K87        | [76-87]              | 3×HYP                           | 1221.572 | 1221.603   | 25.1                | 51.3                              |
|                            | [76-87]              | 3×HYP, HYL                      | 1237.578 | 1237.598   | 16.2                | 51.2                              |
|                            | [76-90]              | 3×HYP, 2×HYL                    | 1537.810 | 1537.778   | 20.5                | 48.8                              |
|                            | [76-90]              | 3×HYP, HYL, G-HYL               | 1699.804 | 1699.831   | 16.1                | 48.3                              |
|                            | [76-90]              | 3×HYP, HYL, GG-HYL              | 1861.885 | 1861.883   | 1.1                 | 47.1                              |
| $\alpha$ -2(I), K174       | [145-174]            | 3×HYP                           | 2588.296 | 2588.251   | 17.4                | 52.7                              |
|                            | [145-174]            | 3×HYP, HYL                      | 2604.302 | 2604.246   | 21.5                | 52.5                              |
|                            | [145-192]            | 3×HYP, HYL                      | 4184.977 | 4185.052   | 17.9                | 55.7                              |
|                            | [145-192]            | 4×HYP, HYL                      | 4200.992 | 4201.047   | 12.9                | 55.4                              |
|                            | [145-192]            | 3×HYP, G-HYL                    | 4347.011 | 4347.104   | 23.7                | 56.5                              |
|                            | [145-192]            | 4×HYP, G-HYL                    | 4363.177 | 4363.099   | 17.8                | 54.8                              |
|                            | [145-192]            | 3×HYP, GG-HYL                   | 4509.125 | 4509.157   | 7.1                 | 56.2                              |
|                            | [145-192]            | 4×HYP, GG-HYL                   | 4525.063 | 4525.152   | 19.6                | 54.6                              |
| $\alpha$ -2(I), K219       | [193-219]            | 3×HYP                           | 2447.276 | 2447.229   | 19.3                | 55.3                              |
|                            | [193-219]            | 3×HYP, HYL                      | 2463.288 | 2463.224   | 26.1                | 55.0                              |
|                            | [193-237]            | 6×HYP, HYL                      | 4037.128 | 4037.045   | 20.4                | 59.9                              |
|                            | [193-237]            | 6×HYP, G-HYL                    | 4199.140 | 4199.098   | 9.9                 | 59.6                              |
|                            | [193-237]            | 6×HYP, GG-HYL                   | 4361.170 | 4361.151   | 4.3                 | 59.3                              |

<sup>a</sup> – Residue number is determined relative to N-helical cross-linking site, Lys 87;

<sup>b</sup> – M<sub>ox</sub> – oxidized methionine (+16 Da), HYP – hydroxyproline, HYL – hydroxylysine, G-HYL – galactosylhydroxylysine, GG-HYL – glucosylgalactosylhydroxylysine

<sup>c</sup> – retention time was determined from a single LC-MS run, based on a gradient from 2 to 40% solvent B over 90 min.

Supplemental Figure 1. Sricholpech *et al.*

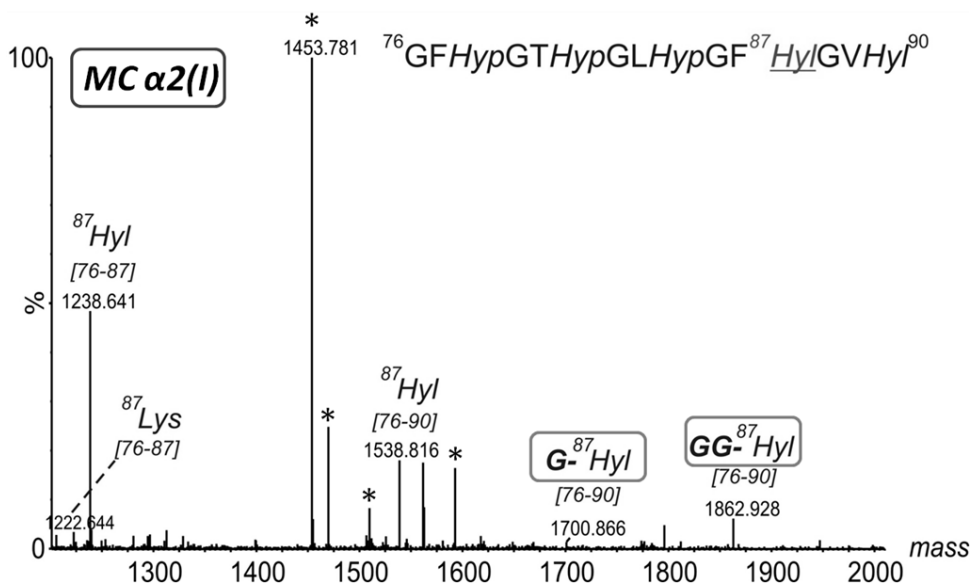

Supplemental Figure 2. Sricholpech *et al.*

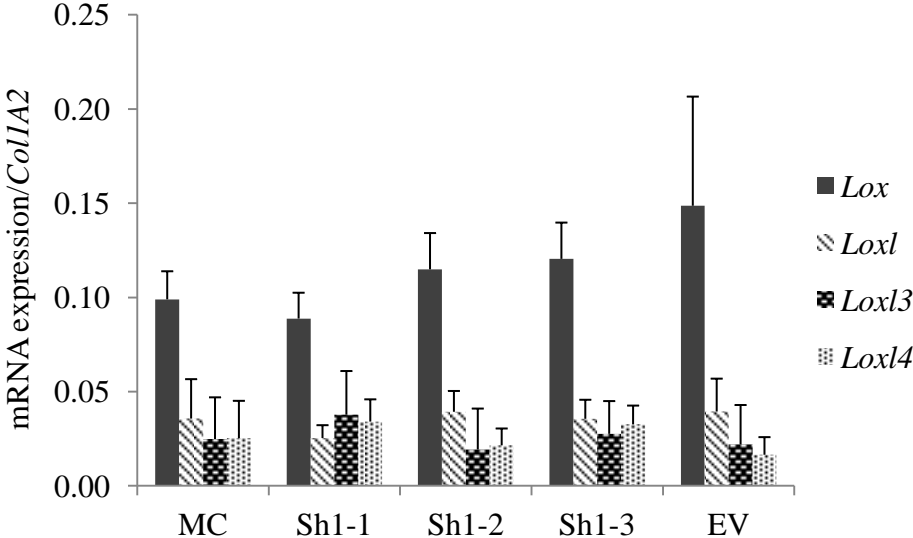

Supplement: supp_M112.343954_jbc.M112.343954-1.pdf [file supp_M112.343954_jbc.M112.343954-1.pdf]
